# Supplementary material for: Co-expression of S100A14 and S100A16 correlates with a poor prognosis in human breast cancer and promotes cancer cell invasion
Source: BMC Cancer. 2015 Feb 13;15:53. doi: 10.1186/s12885-015-1059-6 (PMC4348405; doi:10.1186/s12885-015-1059-6)
Supplement: Additional file 5: Figure S4. — The effects of S100A14 and S100A16 knockdown on in vitro cell growth of MCF7 and SK-BR-3 cells. Growth of the cells was determined by a cell viability (XTT) assay after treatment with siRNAs targeted towards S100A14, S100A16, or both proteins for 48 h (error bars represent S.D., n=3). [file 12885_2015_1059_MOESM5_ESM.pdf]

Archive with 1 entries (1 files):
- 12885_2015_1059_MOESM5_ESM.wmv
