# Supplementary material for: Co-expression of S100A14 and S100A16 correlates with a poor prognosis in human breast cancer and promotes cancer cell invasion
Source: Springer Nature journal article supplement (doi:10.1186/s12885-015-1059-6), 2015-02-12

in vitro growth (XTT assay)

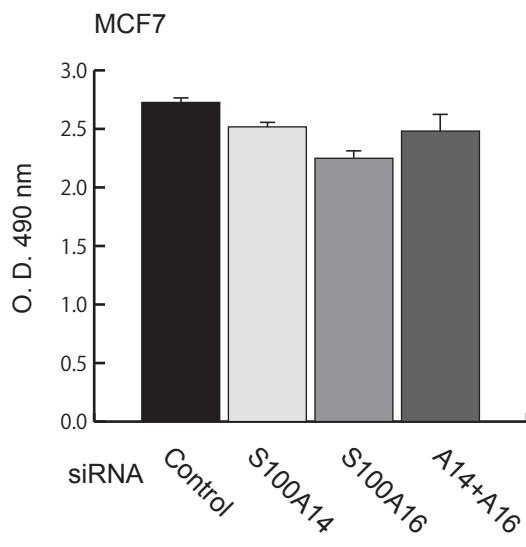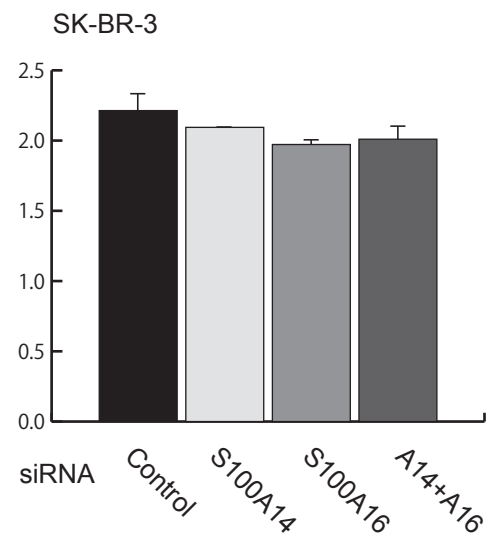

Supplement: MOESM3 [file 9743916]
