# Supplementary material for: Co-expression of S100A14 and S100A16 correlates with a poor prognosis in human breast cancer and promotes cancer cell invasion
Source: Springer Nature journal article supplement (doi:10.1186/s12885-015-1059-6), 2015-02-12

S100A14 expression in Normal and cancerous tissues

| Origin of cancer   | Lung      | Colon     | Breast      | Stomach   | Liver    | Kidney    |
|--------------------|-----------|-----------|-------------|-----------|----------|-----------|
| Positive cases (%) | 7/10 (70) | 8/8 (100) | 88/167 (53) | 8/8 (100) | 5/9 (56) | 2/10 (20) |

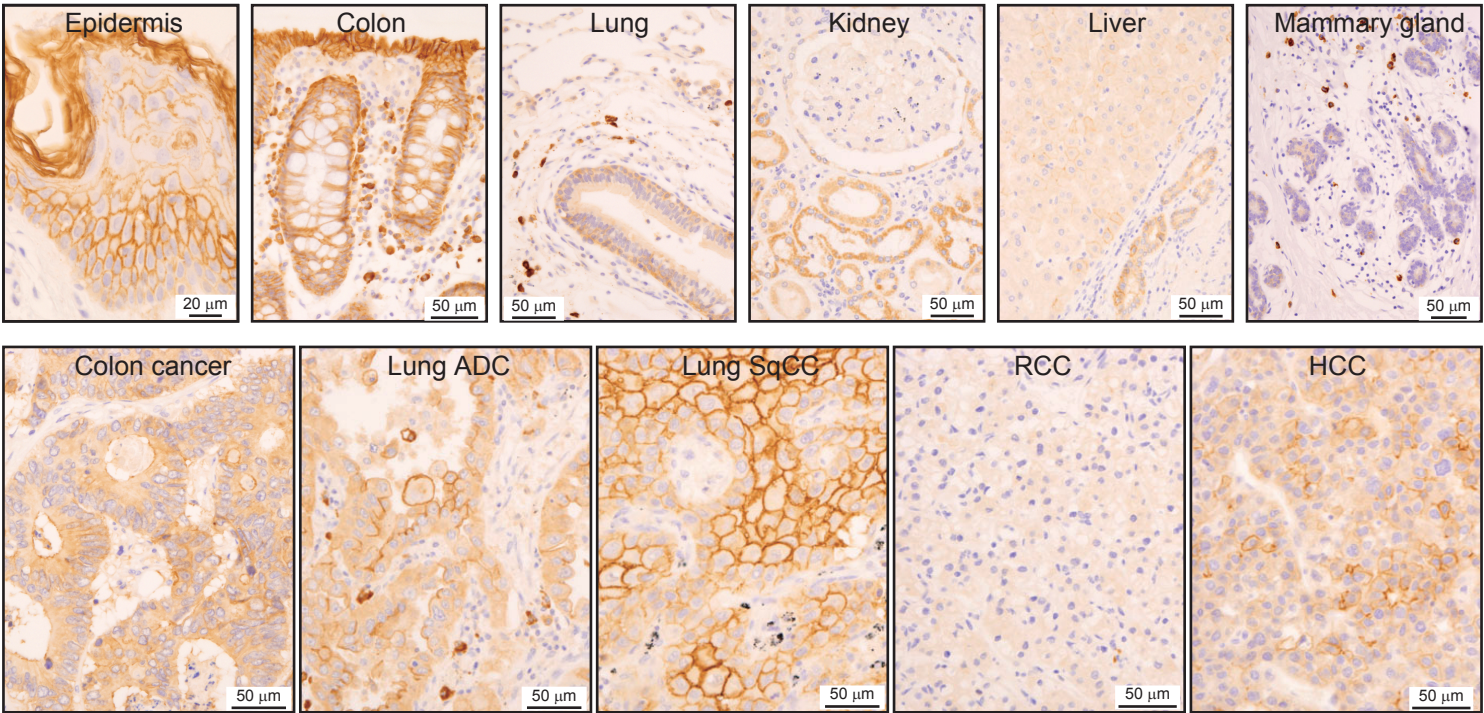

Supplement: MOESM4 [file 9743916]
